# Supplementary material
Source: PubMed Central journal article supplement (PMC5625313)

# Supplementary Figure 1

(A)

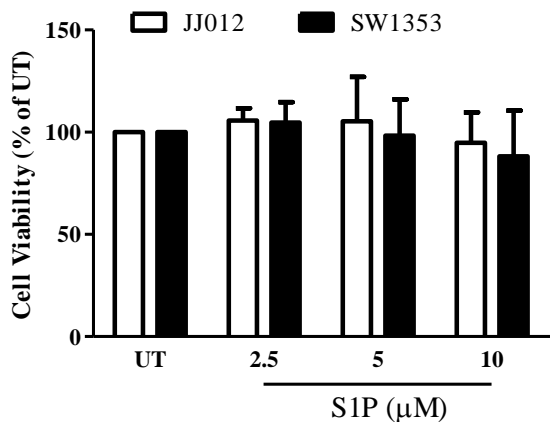

(B)

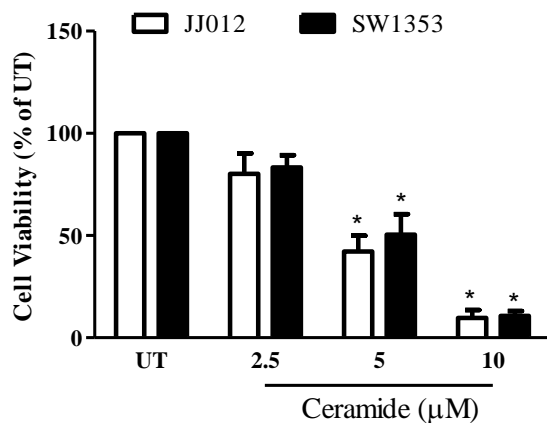

(C)

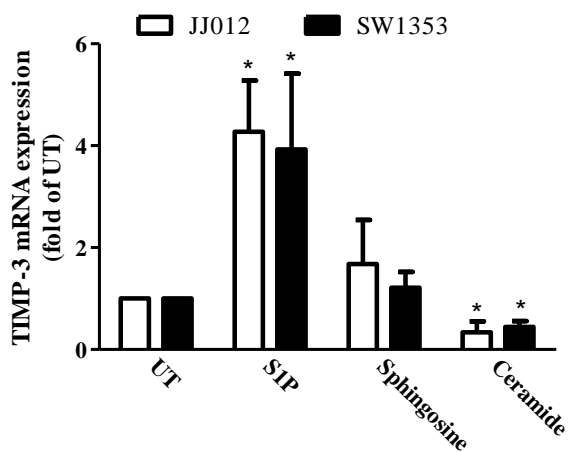

(D)

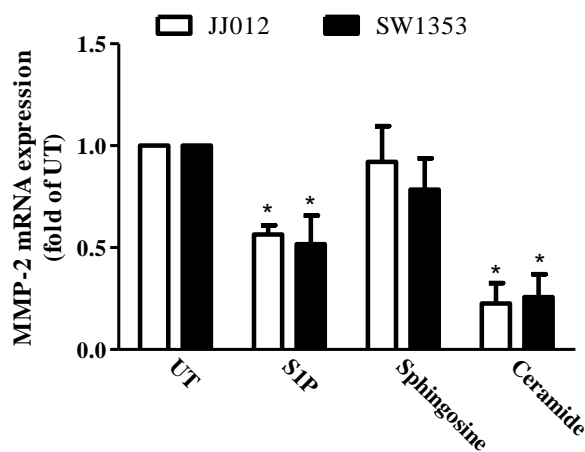

(E)

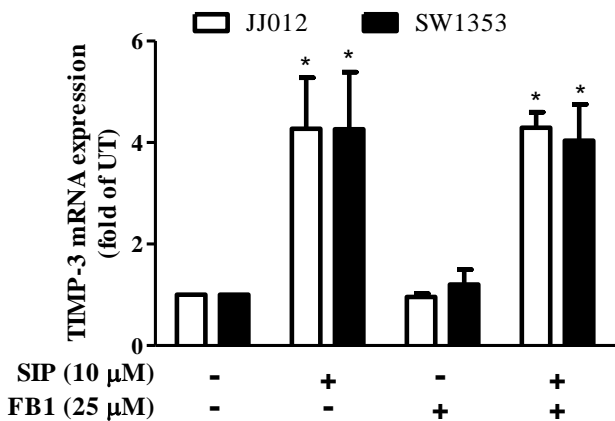

(F)

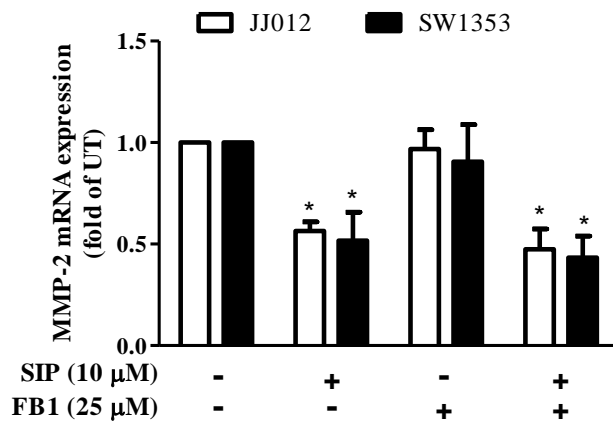

# Supplementary Figure 2

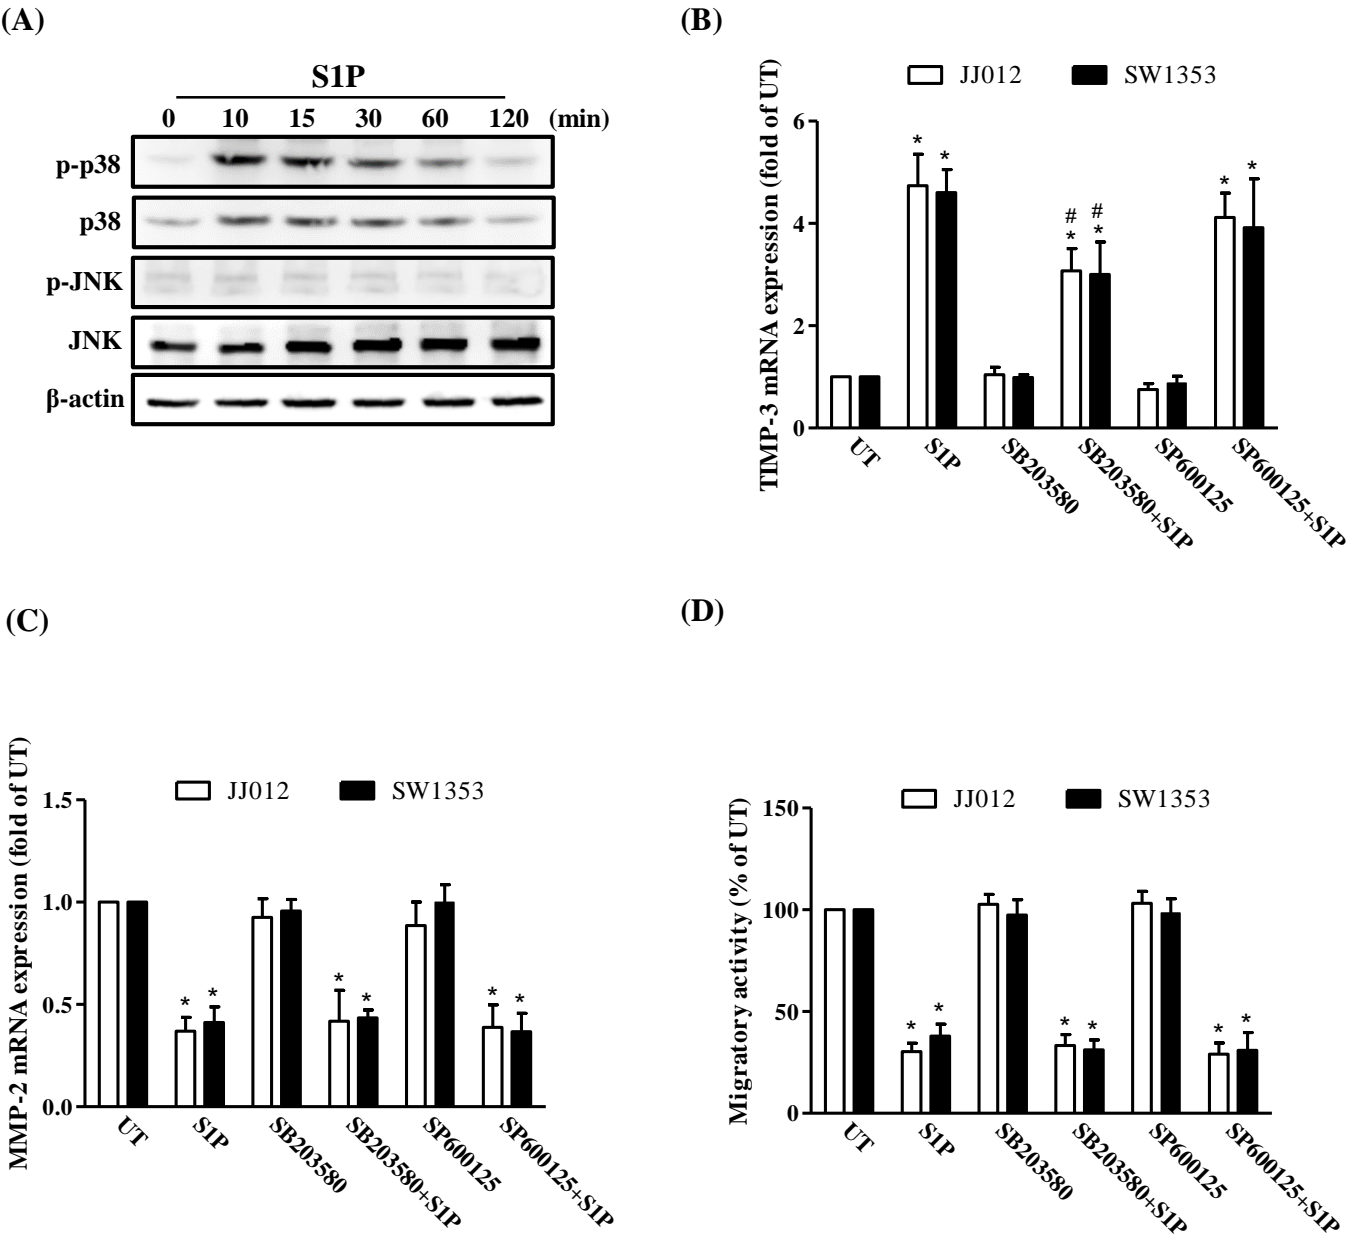

# Supplementary Figure 3

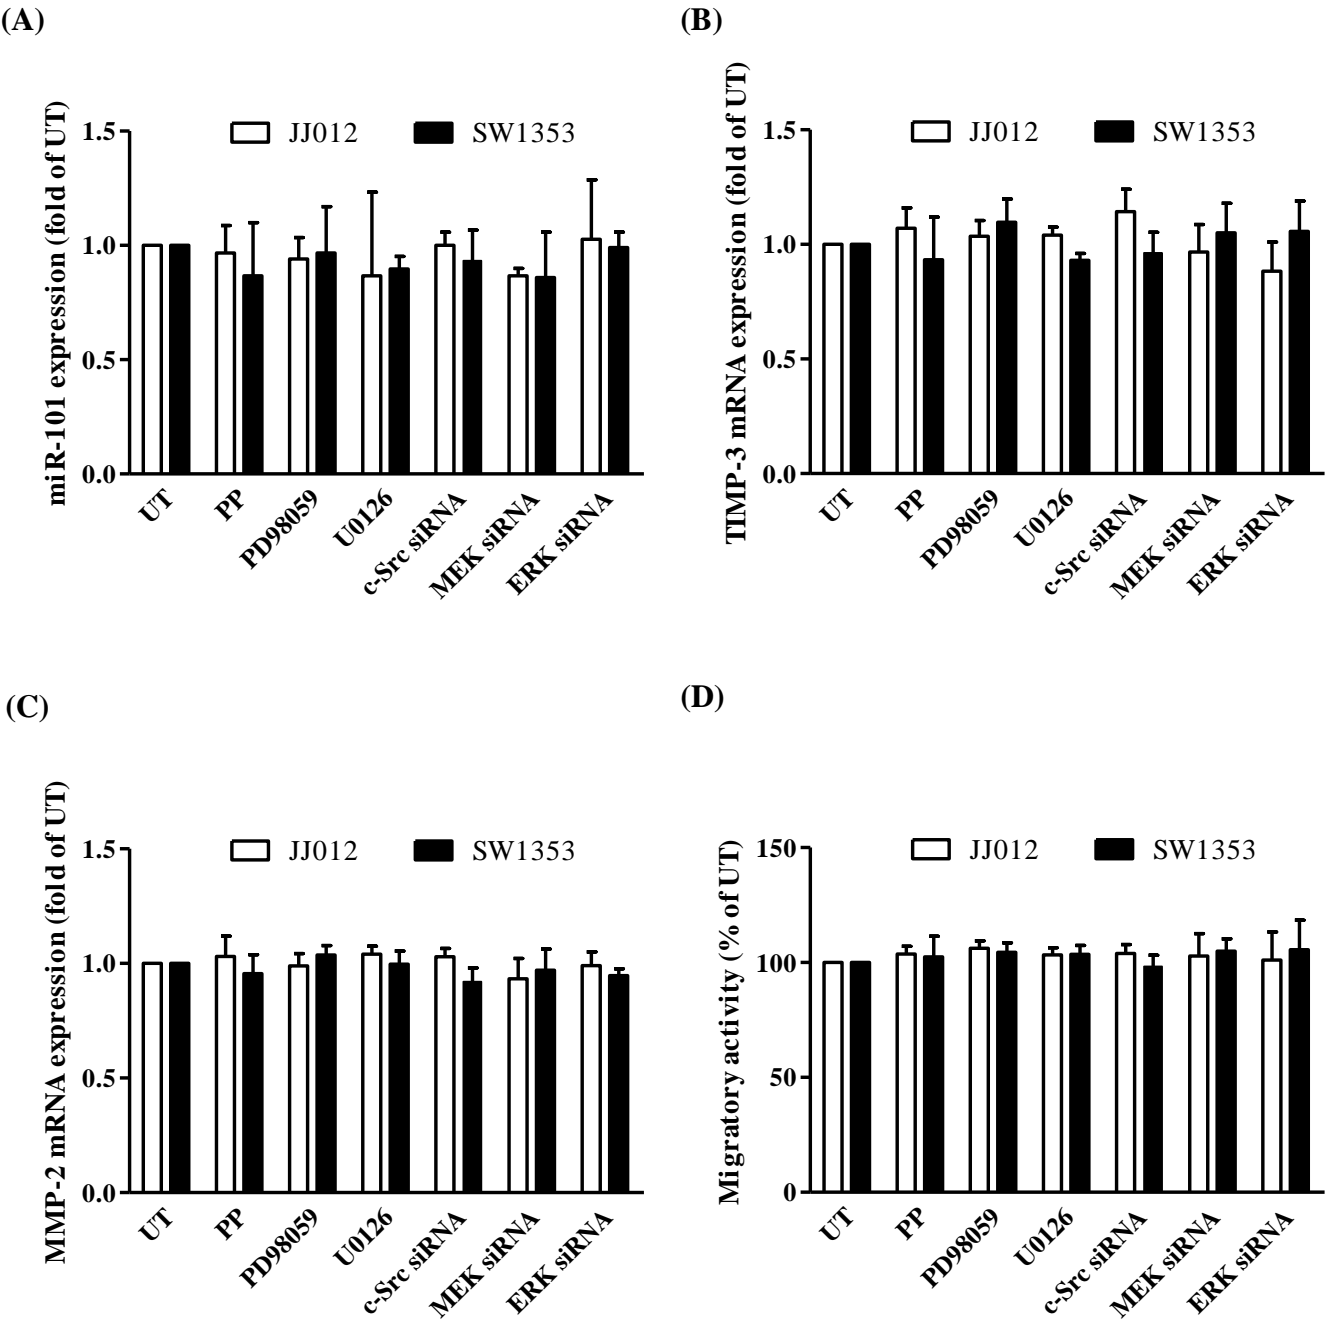

Supplement: MOL2-11-1380-s001.pdf [file MOL2-11-1380-s001.pdf]
